# Supplementary material for: Effects of Switching From Degludec to Glargine U300 in Patients With Type 1 Diabetes Having Large Day-to-day Glycemic Variability: a Retrospective Study
Source: Research Square preprint supplement (doi:10.21203/rs.3.rs-503447/v1), 2021-05-11
Supplement: Supplementary file 1 [file bac6e139b015af87bf46bba9.xlsx]

## Sheet: Sheet1
	Gla-300	Deg	p-value
Age, years	56.4 ± 19.6	52.5 ± 14	N.S.
Females, %	45.5	66.7	N.S.
Duration of diabetes, years	14.7 ± 13.8	18.7 ± 11	N.S.
BMI, kg/m2	22.7 ± 3.0	20.8 ± 2.0	N.S.
s-Cr, mg/dL	1.01 ± 0.74	0.69 ± 0.19	N.S.
eGFR, mL/min/1.73 m2	70.4 ± 25.6	81.5 ± 22.1	N.S.
FPG, mg/dL	147 ± 67	129 ± 53	N.S.
HbA1c, %	7.7 ± 0.7	7.6 ± 0.8	N.S.
SD-FBG, mg/dL	62.4 ± 19	54.2 ± 23	N.S.
Frequency of total hypoglycemia, times per month	6.2 ± 4.3	5.4 ± 5.2	N.S.
Frequency of severe hypoglycemia, times per month	1.5 ± 1.6	1.2 ± 1.5	N.S.
Frequency of nocturnal hypoglycemia, times per month	2.4 ± 1.3	1.8 ± 1.6	N.S.
Dose of ultra-long acting insulin, unit per kg	0.19 ± 0.08	0.20 ± 0.10	N.S.
Dose of bolus insulin, unit per kg	0.34 ± 0.10	0.34 ± 0.12	N.S.
